# Supplementary material for: Conclusions from a behavioral aging study on male and female F2 hybrid mice on age-related behavior, buoyancy in water-based tests, and an ethical method to assess lifespan
Source: publisher site journal article supplement (doi:10.18632/aging.102242), 2019-09-11
Supplement: Supplementary file [file aging-v11i17-102242-supplementary-material-SD2.pdf]

## SUPPLEMENTARY TABLES

**Supplementary Table 1. Order of deaths in lifespan study.**

| Age (days) | Animal             | Cause of death              | Age (days) | Animal             | Cause of death            |
|------------|--------------------|-----------------------------|------------|--------------------|---------------------------|
| 183        | 599, 2 (M), Brown  | Timepoint 7 months          | 444        | 508, 5 (M), Brown  | Timepoint 15 months       |
| 207        | 387, 1 (M), Black, | Timepoint 7 months          | 444        | 153, 1 (F), Brown  | Timepoint 15 months       |
| 207        | 388, 1 (M), Brown  | Timepoint 7 months          | 444        | 154, 2 (F), Brown  | Timepoint 15 months       |
| 207        | 392, 5 (M), Brown  | Timepoint 7 months          | 444        | 156, 2 (F), Albino | Timepoint 15 months       |
| 207        | 226, 2 (F), Brown  | Timepoint 7 months          | 444        | 157, 3 (F), Albino | Timepoint 15 months       |
| 207        | 228, 4 (F), Brown  | Timepoint 7 months          | 444        | 163, 3 (F), Brown  | Timepoint 15 months       |
| 207        | 230, 1 (F), Albino | Timepoint 7 months          | 444        | 165, 5 (F), Brown  | Timepoint 15 months       |
| 207        | 231, 2 (F), Albino | Timepoint 7 months          | 444        | 271, 2 (F), Brown  | Timepoint 15 months       |
| 207        | 341, 1 (F), Brown  | Timepoint 7 months          | 444        | 273, 4 (F), Brown  | Timepoint 15 months       |
| 207        | 342, 2 (F), Brown  | Timepoint 7 months          | 444        | 274, 5 (F), Brown  | Timepoint 15 months       |
| 207        | 406, 6 (F), Brown  | Timepoint 7 months          | 444        | 281, 4 (F), Albino | Timepoint 15 months       |
| 207        | 384, 7 (F), Brown  | Timepoint 7 months          | 445        | 169, 3 (M), Brown  | Timepoint 15 months       |
| 207        | 459, 10 (F), Brown | Timepoint 7 months          | 445        | 174, 3 (M), Albino | Timepoint 15 months       |
| 208        | 184, 1 (M), Brown  | Timepoint 7 months          | 445        | 175, 1 (F), Black  | Timepoint 15 months       |
| 208        | 185, 2 (M), Brown  | Timepoint 7 months          | 445        | 176, 2 (F), Black  | Timepoint 15 months       |
| 208        | 187, 4 (M), Brown  | Timepoint 7 months          | 499        | 411, 3 (M), Brown  | Removed: skinny, wound    |
| 208        | 419, 5 (F), Albino | Timepoint 7 months          | 560        | 420, 1 (F), Black  | Natural death             |
| 308        | 507, 4 (M), Brown  | Removed: testicular tumor   | 570        | 243, 3 (F), Brown  | Removed: skinny           |
| 311        | 530, 5 (M), Brown  | Natural death               | 570        | 220, 4 (M), Brown  | Removed: abdominal tumor  |
| 312        | 532, 2 (M), Albino | Natural death               | 584        | 365, 2 (F), Albino | Removed: ovarian tumor    |
| 322        | 171, 5 (M), Brown  | Removed: skinny, dehydrated | 608        | 471, 8 (M), Brown  | Removed: large spleen     |
| 352        | 192, 2 (F), Brown  | Natural death               | 613        | 610, 3 (M), Brown  | Natural death             |
| 401        | 288, 4 (F), Brown  | Removed: enlarged spleen    | 620        | 539, 3 (M), Brown  | Natural death             |
| 406        | 321, 3 (F), Brown  | Natural death               | 626        | 376, 1 (F), Black  | Natural death             |
| 442        | 246, 1 (M), Brown  | Removed: enlarged spleen    | 626        | 383, 6 (F), Brown  | Removed: tumor eye        |
| 431        | 564, 1 (M), Brown  | Timepoint 15 months         | 626        | 462, 3 (F), Albino | Removed: skinny           |
| 435        | 524, 1 (M), Black  | Timepoint 15 months         | 626        | 474, 3 (M), Albino | Removed: testicular tumor |
| 435        | 525, 2 (M), Black  | Timepoint 15 months         | 627        | 216, 2 (F), Albino | Removed: very skinny      |
| 444        | 527, 2 (M), Brown  | Timepoint 15 months         | 627        | 252, 1 (F), Brown  | Natural death             |
| 444        | 347, 1 (M), Brown  | Timepoint 15 months         | 637        | 247, 2 (M), Brown  | Removed: skinny           |
| 444        | 349, 3 (M), Brown  | Timepoint 15 months         | 646        | 540, 4 (M), Brown  | Removed: large spleen     |
| 444        | 505, 2 (M), Brown  | Timepoint 15 months         | 647        | 538, 2 (M), Brown  | Natural death             |

|     |                    |                       |      |                    |                                         |
|-----|--------------------|-----------------------|------|--------------------|-----------------------------------------|
| 653 | 573, 2 (M), Brown  | Timepoint 23 months   | 667  | 213, 1 (F), Brown  | Timepoint 23 months                     |
| 656 | 537, 1 (M), Brown  | Timepoint 23 months   | 667  | 200, 2 (F), Brown  | Removed: impaired activity              |
| 656 | 542, 6 (M), Brown  | Timepoint 23 months   | 667  | 201, 3 (F), Brown  | Removed: enlarged abdomen, large spleen |
| 656 | 543, 7 (M), Brown  | Timepoint 23 months   | 671  | 622, 4 (M), Brown  | Timepoint 23 months                     |
| 658 | 473, 2 (M), Albino | Removed               | 713  | 191, 1 (F), Brown  | Removed: ovarian tumor                  |
| 659 | 409, 1 (M), Brown  | Removed: large spleen | 751  | 181, 5 (F), Brown  | Natural death                           |
| 666 | 257, 2 (M), Brown  | Timepoint 23 months   | 819  | 566, 3 (M), Brown  | Natural death                           |
| 666 | 259, 4 (M), Brown  | Timepoint 23 months   | 860  | 591, 4 (M), Brown  | Removed                                 |
| 666 | 261, 6 (M), Brown  | Timepoint 23 months   | 888  | 319, 1 (F), Brown  | Natural death                           |
| 666 | 232, 3 (F), Albino | Timepoint 23 months   | 889  | 287, 3 (F), Brown  | Natural death                           |
| 666 | 239, 1 (F), Black  | Timepoint 23 months   | 911  | 368, 1 (M), Brown  | Removed: skinny, impaired activity      |
| 666 | 514, 2 (F), Black, | Timepoint 23 months   | 919  | 608, 1 (M), Brown  | Natural death                           |
| 666 | 522, 1 (F), Albino | Timepoint 23 months   | 923  | 385, 1 (F), Albino | Natural death                           |
| 667 | 195, 1 (M), Brown  | Timepoint 23 months   | 936  | 523, 2 (F), Albino | Natural death                           |
| 667 | 248, 3 (M), Brown  | Timepoint 23 months   | 966  | 285, 1 (F), Brown  | Natural death                           |
| 667 | 407, 1 (M), Black  | Timepoint 23 months   | 1001 | 179, 3 (F), Brown  | Natural death                           |
| 667 | 200, 2 (F), Brown  | Timepoint 23 months   | 1051 | 499, 1 (F), Brown  | Natural death                           |
| 667 | 201, 3 (F), Brown  | Timepoint 23 months   |      |                    |                                         |

Individual data of each mice in the lifespan analysis; age (days), animal number, sex, coat color and indication of death. The ages of the mice were exactly  $6.6-7.8 \pm 0.2$ ,  $14.5-15.6 \pm 0.1$  and  $21.8-22.5 \pm 0.2$  months  $\pm$ SD. Lifespan analysis:  $n_{\text{males}}=48$ ,  $n_{\text{females}}=51$ , including lifespan study:  $n_{\text{males}}=20$ ,  $n_{\text{females}}=22$  and behavioral timepoints:  $n_{M7}=7$ ,  $n_{M15}=10$ ,  $n_{M22}=10$ ,  $n_{F7}=9$ ,  $n_{F15}=12$ ,  $n_{F22}=7$ .

**Supplementary Table 2. Additional physiological parameters.**

|         |    | <b>BL</b>                | <b>Body Temp</b>           | <b>BMD</b>            | <b>BMC</b>               | <b>Fat mass</b>         | <b>Lean mass</b>           |
|---------|----|--------------------------|----------------------------|-----------------------|--------------------------|-------------------------|----------------------------|
|         |    | (cm)                     | (°C)                       | (mg/cm <sup>2</sup> ) | (g)                      | (g)                     | (g)                        |
| MALES   | 7  | 10.8 ± 0.11 <sup>2</sup> | 36.7 ± 0.18 <sup>1,2</sup> | 56.5 ± 1.34           | 0.62 ± 0.03              | 9.4 ± 1.2 <sup>2</sup>  | 25.5 ± 0.83 <sup>1,2</sup> |
|         | 15 | 10.7 ± 0.11              | 37.2 ± 0.11 <sup>1,2</sup> | 57.1 ± 1.05           | 0.65 ± 0.02 <sup>2</sup> | 9.9 ± 1.2 <sup>2</sup>  | 25.4 ± 0.98 <sup>1,2</sup> |
|         | 22 | 10.8 ± 0.11              | 36.5 ± 0.13 <sup>1,2</sup> | 56.3 ± 1.13           | 0.65 ± 0.02              | 9.9 ± 1.7               | 28.7 ± 0.46 <sup>1,2</sup> |
| FEMALES | 7  | 10.3 ± 0.09 <sup>2</sup> | 38.4 ± 0.16 <sup>1,2</sup> | 56.8 ± 0.84           | 0.56 ± 0.02              | 11.0 ± 0.8 <sup>2</sup> | 20.0 ± 0.59 <sup>1,2</sup> |
|         | 15 | 10.5 ± 0.11              | 37.6 ± 0.10 <sup>1,2</sup> | 49.3 ± 4.58           | 0.51 ± 0.04 <sup>2</sup> | 14.1 ± 1.8 <sup>2</sup> | 20.7 ± 0.85 <sup>1,2</sup> |
|         | 22 | 11.0 ± 0.12              | 37.7 ± 0.18 <sup>1,2</sup> | 56.8 ± 1.35           | 0.63 ± 0.04              | 10.6 ± 1.6              | 23.5 ± 1.02 <sup>1,2</sup> |

Body composition and core temperatures were analyzed by DEXA and rectal thermometer. <sup>1</sup>Statistical significance within sex, <sup>2</sup>statistical significance between sexes. Body length <sup>2</sup>p<sub>M7-F7</sub>=0.0040, body temperature <sup>1</sup>p<sub>M7-15</sub>=0.055, p<sub>M7-15</sub>=0.0017, p<sub>M15-22</sub>=0.00072, p<sub>F15-22</sub>=0.017; <sup>2</sup>p<sub>M7-F7</sub>>0.0001, p<sub>M15-F15</sub>=0.0044, p<sub>M22-F22</sub>=0.00013, bone mineral density (BMD), bone mineral content (BMC) <sup>2</sup>p<sub>M15-F15</sub>=0.0060, fat mass <sup>2</sup>p<sub>M7-F7</sub>=0.0023, p<sub>M15-F15</sub>=0.0012 (Welch's t-test), and lean mass <sup>2</sup>p<sub>M7-F7</sub>=0.0002, p<sub>M15-F15</sub>=0.0006, p<sub>M22-F22</sub>=0.0007, <sup>1</sup>p<sub>M7-22</sub>=0.0061, p<sub>M15-22</sub>=0.0095, p<sub>F7-22</sub>=0.011, p<sub>F15-22</sub>=0.023 (Mann-Whitney). n<sub>M7</sub>=7 n<sub>M15</sub>=10 n<sub>M22</sub>=10 n<sub>F7</sub>=9 n<sub>F15</sub>=12 n<sub>F22</sub>=7 Mean ± SEM.

**Supplementary Table 3. Order of behavioral tests at 7-, 15-, and 22-month-old timepoints.**

| MALES |      |      | FEMALES |      |      |
|-------|------|------|---------|------|------|
| 7     | 15   | 22   | 7       | 15   | 22   |
| FST   | OFT  | DEXA | OFT     | DEXA | OFT  |
| OFT   | DEXA | OFT  | FST     | FST  | PAT  |
| PAT   | PAT  | FST  | PAT     | PAT  | DEXA |
| DEXA  | FST  | PAT  | DEXA    | OFT  | FST  |

Behavioral and physiological analyses: forced swim test (FST), activity box – open field test (OFT), shuttle-box passive avoidance test (PAT), dual energy X-ray absorptiometry (DEXA). n=7-12 per group
